# Supplementary material
Source: PubMed Central journal article supplement (PMC2875693)

## Supplemental Material

Psaty BM, O'Donnell CJ, Gudnason V, Lunetta KL, Folsom AR, Rotter JI, Uitterlinden AG, Harris TB, Witteman JCM, Boerwinkle E on behalf of the CHARGE Consortium. Cohorts for Heart and Aging Research in Genomic Epidemiology (CHARGE) Consortium: Design of prospective meta-analyses of genome-wide association studies from five cohorts. *Circ Cardiovasc Genet*.

## Supplemental figure legends

Supplemental Figure 1. Statistical power for detecting associations with a continuous phenotype. Abbreviations:  $n$ , number of subjects in all cohorts combined; Effect Size in units of standard deviation; MAF = minor allele frequency. Two-sides alpha levels of  $1E-6$  (black),  $5E-7$  (red), and  $5E-8$  (green).

Supplemental Figure 2. Statistical power for detecting associations with a binary phenotype. Abbreviations:  $n$ , number of clinical events from all cohorts; RelRisk = relative risk; MAF = minor allele frequency. Two-sides alpha levels of  $1E-6$  (black),  $5E-7$  (red), and  $5E-8$  (green).

(Supplemental Figure 1)

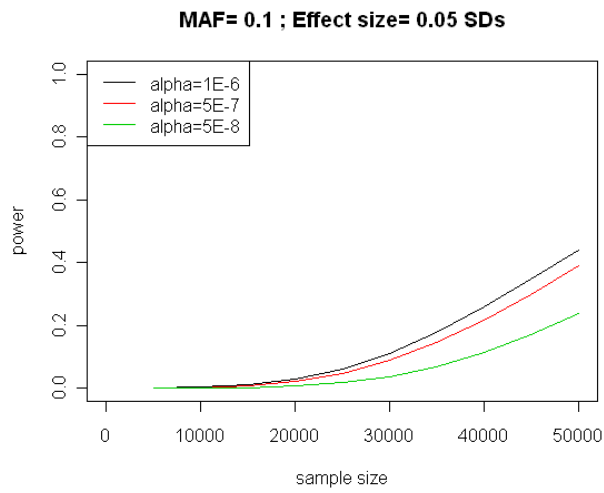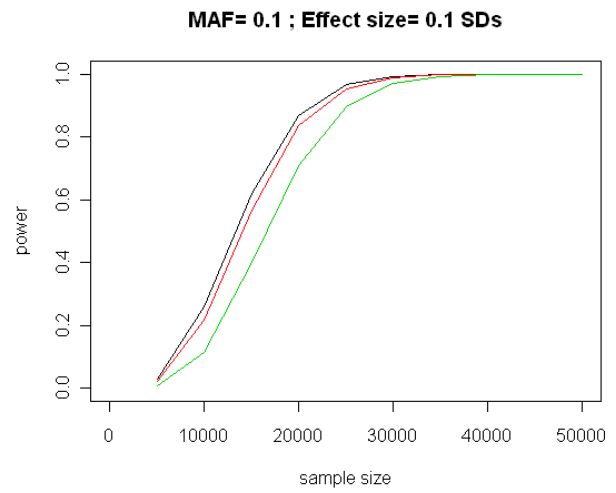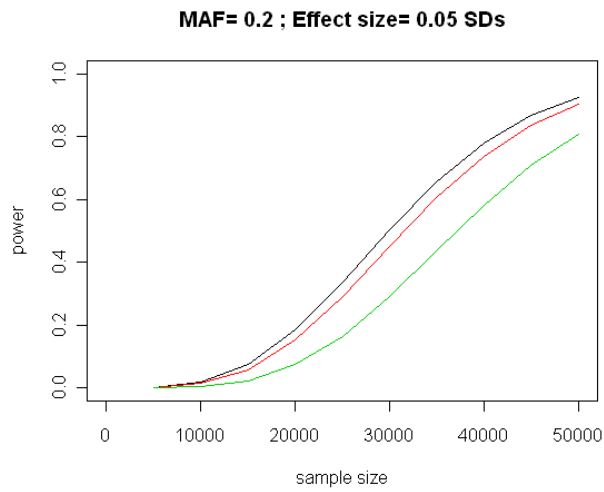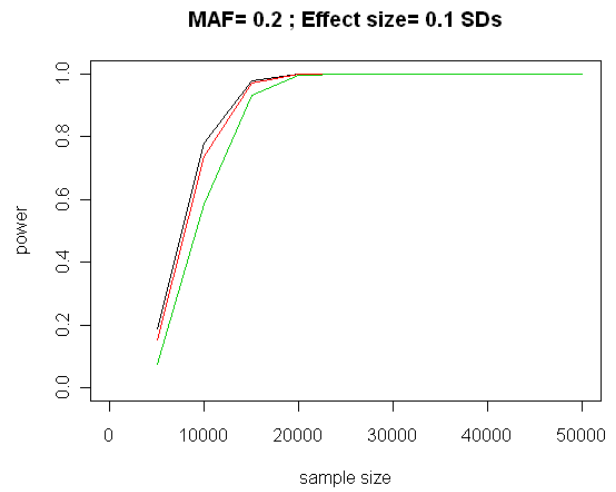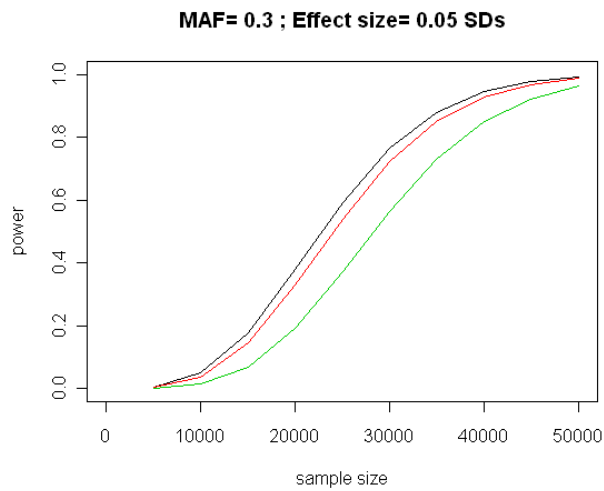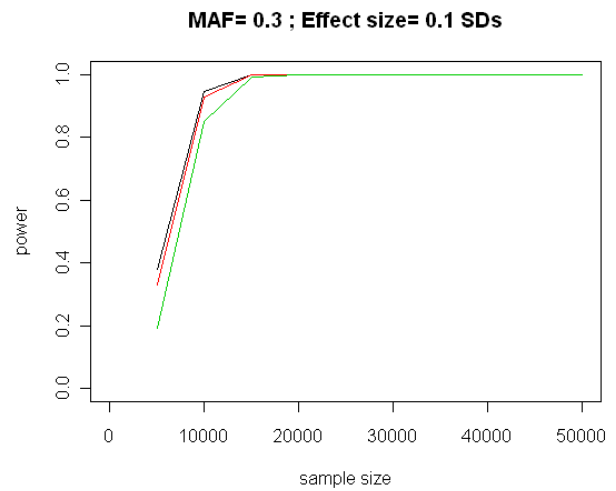

(Supplemental Figure 2)

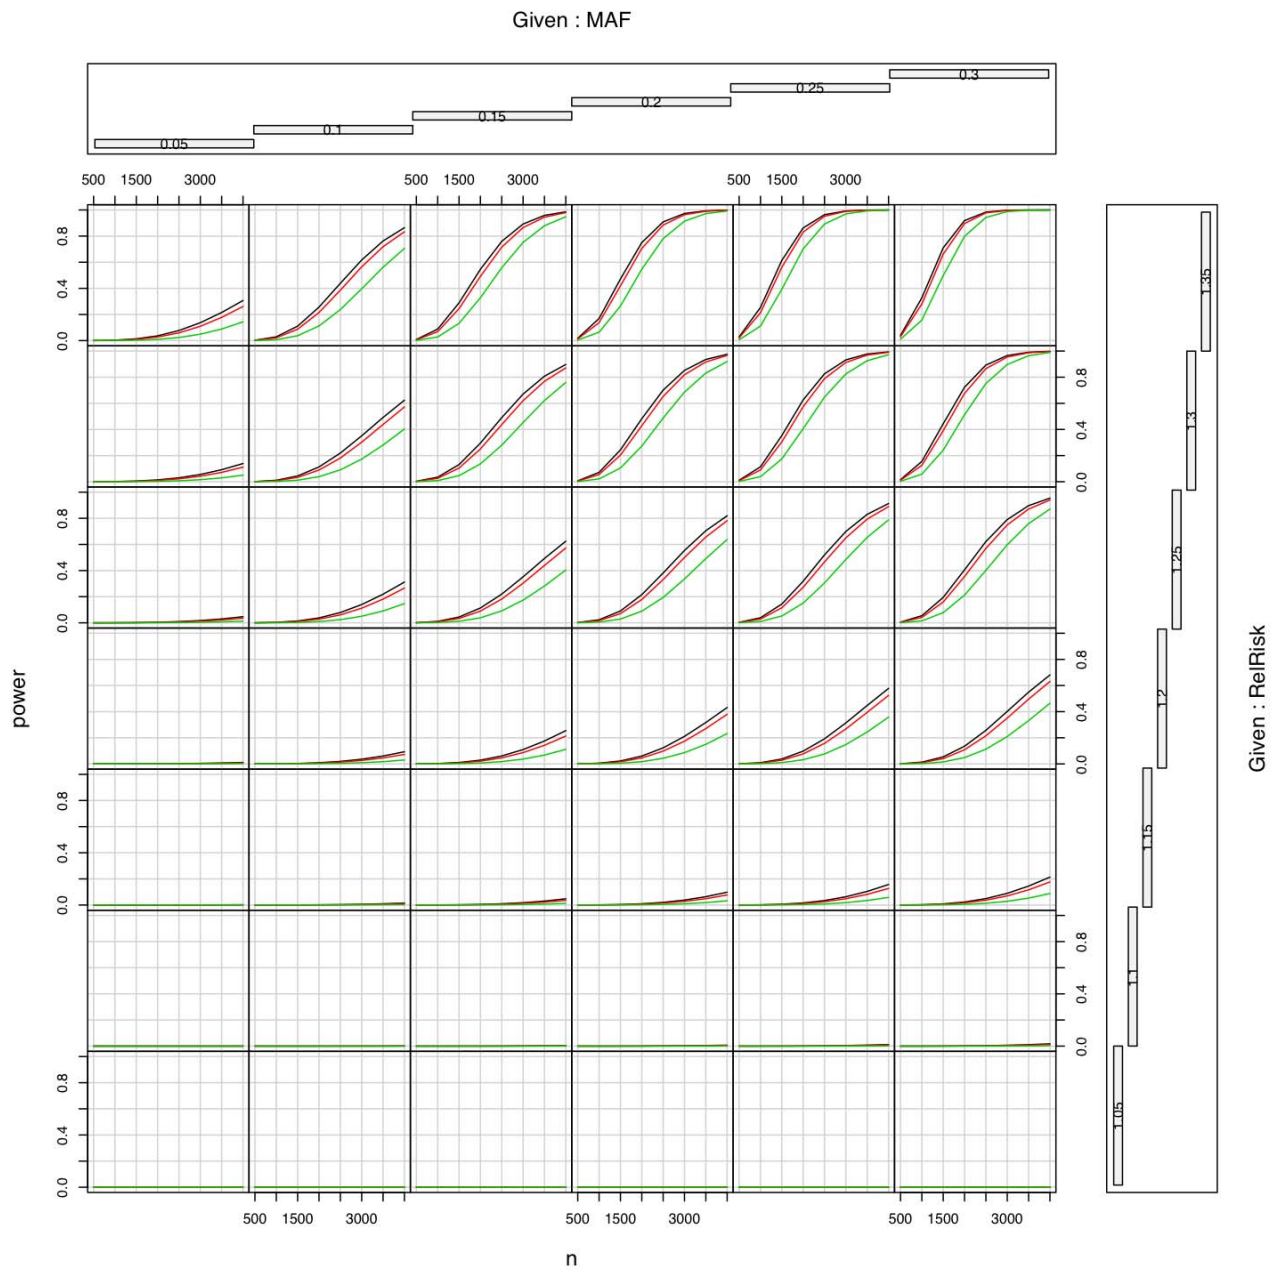

Supplement: NIHMS95336-supplement-1.pdf [file NIHMS95336-supplement-1.pdf]
